# Supplementary material
Source: PubMed Central journal article supplement (PMC1135025)
Supplement: bj3870911add.pdf [file bj3870911add.pdf]

## Supplementary Information

**Table S1. Identification of MUC5B and MUC5AC in submucosal gland secretions.**

The major high molecular weight glycoprotein in submucosal gland secretions migrating with a molecular mass of ~4 MDa by 1D SDS-AgPAGE was excised and digested with trypsin, and the resulting peptides were analysed by MALDI-TOF-MS. PMF searching identified the presence of (A) MUC5B and (B) MUC5AC. Details of the proteins identified, masses of the tryptic peptides detected, error to the theoretical peptide masses, the position of the peptides within each protein, and the peptide sequences are shown for CF subject 1. This data is representative of all subjects.

| A      |             | Protein                                    | SwissProt Accession | MW (Da) | pI                  | Unique Peptide Hits     | % Coverage |
|--------|-------------|--------------------------------------------|---------------------|---------|---------------------|-------------------------|------------|
|        |             | Mucin 5B                                   | Q9HC84              | 590122  | 6.24                | 42                      | 10.56      |
| m/z    | Error (ppm) | Peptide Position                           |                     |         | Alkylated Cysteines | Peptide Sequence        |            |
| 605.3  | 34.2        | 5364-5368                                  |                     |         |                     | FPGER                   |            |
| 722.4  | 33.3        | 1009-1014                                  |                     |         |                     | TSVFIR                  |            |
| 879.4  | -56.5       | 5283-5289                                  |                     |         | 1                   | GVCSDWIR                |            |
| 893.4  | 34.5        | 155-161                                    |                     |         |                     | EELPYSR                 |            |
| 906.4  | -39.5       | 1588-1593                                  |                     |         | 1                   | MCYNYR                  |            |
| 931.5  | -69.8       | 321-327                                    |                     |         | 2                   | CPELCPR                 |            |
| 960.6  | -62.2       | 678-685                                    |                     |         |                     | GVQLSDWR                |            |
| 973.6  | -46.6       | 5190-5197                                  |                     |         |                     | TWLVPSDR                |            |
| 1036.6 | -38.3       | 2362-2371, 2891-2900, 3589-3598            |                     |         |                     | AQAQPGVPLR              |            |
| 1077.5 | -47.6       | 1070-1078                                  |                     |         | 1                   | DPCTANPFR*              |            |
| 1107.6 | -24.0       | 626-635                                    |                     |         |                     | LTDPNSAFSR              |            |
| 1132.5 | -33.6       | 2398-2405, 2927-2934, 3625-3632, 4154-4161 |                     |         | 1                   | MCFNYEIR                |            |
| 1140.7 | 4.6         | 121-131                                    |                     |         |                     | GLVGSRPVVTR             |            |
| 1258.7 | 44.4        | 226-236                                    |                     |         |                     | LTPQLFGNLQK             |            |
| 1325.7 | -53.6       | 109-119                                    |                     |         |                     | AAYEDFNQLR              |            |
| 1364.7 | -52.8       | 1867-1876                                  |                     |         | 1                   | FNMCFNYNVR              |            |
| 1468.8 | -40.5       | 456-468                                    |                     |         | 1                   | CADSSFTVLAELR           |            |
| 1498.8 | -36.9       | 1567-1578                                  |                     |         | 2                   | VHCDVHFGLVCR            |            |
| 1508.7 | 38.8        | 1044-1057                                  |                     |         |                     | SVVGDALEFGNSWK          |            |
| 1539.8 | 2.6         | 455-468                                    |                     |         |                     | KCADSSFTVLAELR          |            |
| 1539.8 | 2.6         | 456-469                                    |                     |         |                     | CADSSFTVLAELRK*         |            |
| 1617.8 | -41.4       | 1085-1098                                  |                     |         | 2                   | QCSILHGPTFAACR          |            |
| 1630.8 | -44.1       | 2346-2361, 2875-2890, 3573-3588, 4102-4117 |                     |         | 1                   | AAGGAVCEQPLGLECR        |            |
| 1679.9 | -54.5       | 1369-1382                                  |                     |         | 2                   | GYQVCPVLADIECR          |            |
| 1687.8 | -29.9       | 2346-2361, 2875-2890, 3573-3588, 4102-4117 |                     |         | 2                   | AAGGAVCEQPLGLECR*       |            |
| 1724.9 | -40.7       | 938-954                                    |                     |         |                     | IVTENIPCGTTGTTCSK*      |            |
| 1747.8 | -37.6       | 294-307                                    |                     |         | 3                   | CPTCPATFVEYSR           |            |
| 1848.0 | -43.5       | 5305-5320                                  |                     |         | 2                   | VYKPCGPIQATCNSR         |            |
| 1938.0 | -41.2       | 5265-5280                                  |                     |         | 2                   | LEVPCQSLAAYALCR         |            |
| 1981.0 | -34.2       | 2372-2388, 2901-2917, 3599-3615            |                     |         | 2                   | ELGQVVECSLDFGLVCR       |            |
| 2027.9 | 12.6        | 1766-1784                                  |                     |         |                     | TETTMSPLTNTTTSQGTTR     |            |
| 2113.0 | -40.1       | 659-677                                    |                     |         | 3                   | SEDCLCAALSSVYHACAAK     |            |
| 2113.0 | -7.3        | 1182-1200                                  |                     |         | 2                   | NPSGHCLVDLPGLEGCYPK     |            |
| 2122.9 | -21.4       | 4906-4922                                  |                     |         | 3                   | AGCHFVAVCNQHCDIDR       |            |
| 2151.0 | 27.4        | 938-957                                    |                     |         | 2                   | IVTENIPCGTTGTTCSKAIK    |            |
| 2257.9 | -15.6       | 5632-5649                                  |                     |         |                     | YSAEAAQAMHQCTCCQER      |            |
| 2257.9 | 39.1        | 1021-1041                                  |                     |         | 3                   | GRVCGLCGNFDDNAINDFATR   |            |
| 2262.1 | -35.1       | 1405-1424                                  |                     |         |                     | GLMCANSQSQSPPLCHDYELR   |            |
| 2285.0 | 28.1        | 1383-1402                                  |                     |         | 1                   | AAQLPDMPLLEELGQVDCDR    |            |
| 2315.1 | -8.8        | 1021-1041                                  |                     |         | 1                   | GRVCGLCGNFDDNAINDFATR   |            |
| 2376.1 | -28.0       | 1405-1424                                  |                     |         | 2                   | GLMCANSQSQSPPLCHDYELR   |            |
| 2878.1 | 22.1        | 328-351                                    |                     |         | 4                   | TCPLNMQHQECGSPCTDCSNPQR |            |

\* Sequence confirmed by MS/MS

| B      |             | Protein                     | SwissProt Accession | MW (Da) | pI                  | Unique Peptide Hits  | % Coverage |
|--------|-------------|-----------------------------|---------------------|---------|---------------------|----------------------|------------|
|        |             | Mucin 5AC                   | Q8WWQ4              | 135520  | 9.11                | 10                   | 14.68      |
| m/z    | Error (ppm) | Peptide Position            |                     |         | Alkylated Cysteines | Peptide Sequence     |            |
| 862.4  | -13.6       | 269-275, 567-573, 1000-1006 |                     |         | 1                   | EEGLVCR              |            |
| 900.5  | 37.0        | 238-244, 969-975            |                     |         |                     | RPEEITR*             |            |
| 1022.5 | -12.6       | 223-230, 521-528, 954-961   |                     |         |                     | ETYNIIIR             |            |
| 1046.6 | -87.7       | 178-187                     |                     |         |                     | TSTSHVSISK           |            |
| 1061.5 | -7.9        | 276-284, 574-582, 1007-1015 |                     |         |                     | NQDQQGPFK*           |            |
| 1084.5 | -35.1       | 285-292, 583-590, 1016-1023 |                     |         | 1                   | MCLNYEVR*            |            |
| 1360.6 | -30.1       | 495-504, 928-937            |                     |         | 2                   | DCHPRCTWTK           |            |
| 1848.0 | -53.6       | 269-284, 567-582, 1000-1015 |                     |         |                     | EEGLVCRNQDQQGPFK     |            |
| 2062.1 | -36.9       | 549-566                     |                     |         | 1                   | SHPEVSIIEHLGQVVQCSR  |            |
| 2262.1 | 1.6         | 249-268, 980-999            |                     |         | 1                   | AESHPVSIIEHLGQVVQCSR |            |

\* Sequence confirmed by MS/MS

**Table S2. Identification of gp-340 in submucosal gland secretions.**

The high molecular weight glycoprotein in submucosal gland secretions migrating with a molecular mass of ~1 MDa by 1D SDS-AgPAGE was excised and digested with trypsin, and the resulting peptides were analysed by MALDI-TOF-MS. PMF searching identified the presence of gp-340 variant protein. Details of the protein identified, masses of the tryptic peptides detected, error to the theoretical peptide masses, the position of the peptides within each protein, and the peptide sequences are shown for non-CF lung disease subject 3. This data is representative of all subjects.

| Protein    | SwissProt Accession | MW (Da)                                                                                                               | pI   | Unique Peptide Hits | % Coverage          |                     |                     |  |
|------------|---------------------|-----------------------------------------------------------------------------------------------------------------------|------|---------------------|---------------------|---------------------|---------------------|--|
| Gp-340     | Q9UKJ4              | 260591                                                                                                                | 5.18 | 11                  | 19.9                |                     |                     |  |
| <i>m/z</i> | Error (ppm)         | Peptide Position                                                                                                      |      |                     | Oxidised Methionine | Alkylated Cysteines | Peptide Sequence    |  |
| 730.4      | -1.7                | 104-110, 236-242, 365-371, 496-502, 604-610, 864-870, 995-1001, 1124-1130, 1253-1259, 1382-1388, 1511-1517, 1642-1648 |      |                     |                     |                     | LVNGDGR             |  |
| 778.4      | -38.2               | 247-252, 376-381, 507-512, 615-620, 746-751, 875-880, 1145-1140, 1264-1269, 1393-1398, 1653-1658                      |      |                     |                     |                     | VEVLYR              |  |
| 838.4      | 103.9               | 2360-2366                                                                                                             |      |                     |                     |                     | CKMVVCR             |  |
| 991.6      | -36.4               | 245-252, 1651-1658                                                                                                    |      |                     |                     |                     | GRVEVLYR            |  |
| 1279.7     | 53.2                | 372-381, 503-512, 611-620, 742-751, 871-880, 1131-1140, 1260-1269, 1389-1398                                          |      |                     |                     | 1                   | CQGRVEVLYR          |  |
| 1420.7     | -82.3               | 2086-2098                                                                                                             |      |                     |                     |                     | GSFTSSSNFMSIR       |  |
| 1459.8     | -72.3               | 418-431, 549-562, 657-670, 788-801, 917-930, 1048-1061, 1177-1190, 1306-1319, 1435-1448, 1695-1708                    |      |                     |                     |                     | FGQGS GPVLD D V R * |  |
| 1545.7     | -82.0               | 403-417, 902-916, 1291-1305, 1420-1434                                                                                |      |                     |                     | 1                   | QLGCGWATSAPGNAR     |  |
| 1575.7     | -85.0               | 642-656, 773-787, 1162-1176, 1680-1694                                                                                |      |                     |                     | 1                   | QLGCGWAMSAPGNAR     |  |
| 1591.7     | -49.7               | 642-656, 773-787, 1162-1176, 1680-1694                                                                                |      |                     | 1                   | 1                   | QLGCGWAMSAPGNAR     |  |
| 1601.8     | -51.2               | 534-548                                                                                                               |      |                     |                     | 1                   | QLGCGWAMLAPGNAR     |  |

\* Sequence confirmed by MS/MS

**Table S3. Monosaccharide compositions of *O*-linked oligosaccharides from MUC5B/MUC5AC.** *O*-linked oligosaccharides were released by reductive  $\beta$ -elimination from MUC5B/MUC5AC in submucosal gland fluid. The resulting oligosaccharide alditols were analysed by LC-ESI-MS/MS, and their relative intensities were determined based on single-ion chromatograms. GlycoComp was used to determine the monosaccharide composition of the detected oligosaccharides. Masses corresponding to oligosaccharides, the monosaccharide composition of each oligosaccharide and the normalised percent abundance of each oligosaccharide from each subject are shown.

| M          | Composition     | CF Lung Disease |      |      |      |      | Non-CF Lung Disease |      |      |      |      | Control |      |      |
|------------|-----------------|-----------------|------|------|------|------|---------------------|------|------|------|------|---------|------|------|
|            |                 | 1               | 2    | 3    | 4    | 5    | 1                   | 2    | 3    | 4    | 5    | 1       | 2    | 3    |
| Neutral    |                 |                 |      |      |      |      |                     |      |      |      |      |         |      |      |
| 531.2      | [1, 1, 1, 0, 0] |                 |      |      |      | 6.1  |                     |      |      |      | 0.5  |         |      |      |
| 588.1      | [2, 1, 0, 0, 0] | 0.8             | 0.9  |      | 1.4  |      | 1.7                 | 1.9  | 0.8  | 1.0  | 3.9  |         | 16.2 |      |
| 734.2      | [2, 1, 1, 0, 0] | 3.8             | 2.5  | 1.7  |      | 6.5  |                     | 4.4  | 4.5  | 3.1  |      | 7.5     |      |      |
| 750.3      | [2, 2, 0, 0, 0] |                 |      |      | 1.9  |      | 3.2                 | 1.0  | 1.7  | 1.2  | 1.4  | 0.8     | 2.9  |      |
| 791.2      | [3, 1, 0, 0, 0] |                 |      |      |      |      |                     | 2.1  | 1.5  | 1.2  |      |         | 2.0  |      |
| 880.2      | [2, 1, 2, 0, 0] |                 |      | 0.7  |      |      |                     |      |      | 0.3  |      | 1.6     |      |      |
| 896.2      | [2, 2, 1, 0, 0] |                 | 2.8  | 1.9  |      | 4.9  |                     | 4.2  | 3.8  | 5.1  |      | 4.2     | 3.5  |      |
| 937.2      | [3, 1, 1, 0, 0] | 6.3             |      | 6.4  |      | 6.2  |                     | 4.8  | 3.0  | 1.1  |      | 12.7    |      |      |
| 953.3      | [3, 2, 0, 0, 0] |                 |      |      |      |      | 7.3                 | 2.5  | 5.6  | 2.7  | 1.7  | 3.1     | 7.8  |      |
| 1042.4     | [2, 2, 2, 0, 0] |                 |      | 3.7  |      | 6.9  |                     | 2.3  | 4.1  | 1.3  |      | 7.4     |      |      |
| 1083.3     | [3, 1, 2, 0, 0] | 1.9             |      | 1.4  |      |      |                     | 2.1  | 0.5  |      |      |         |      |      |
| 1099.3     | [3, 2, 1, 0, 0] | 1.6             | 5.8  | 7.9  |      | 6.6  | 4.2                 | 10.6 | 5.8  | 14.2 | 5.0  | 1.6     | 7.3  | 6.8  |
| 1140.4     | [4, 1, 1, 0, 0] | 6.4             |      |      |      |      |                     |      |      |      |      |         |      |      |
| 1188.3     | [2, 2, 3, 0, 0] | 1.5             |      | 2.3  |      |      |                     | 2.3  |      |      |      | 3.1     |      |      |
| 1204.4     | [2, 3, 2, 0, 0] |                 |      |      |      |      |                     |      |      |      | 2.3  |         |      |      |
| 1245.4     | [3, 2, 2, 0, 0] |                 | 8.1  | 16.8 |      | 16.8 |                     | 14.7 | 13.1 | 6.1  |      | 21.9    | 2.8  |      |
| 1261.3     | [3, 3, 1, 0, 0] |                 |      |      |      |      |                     | 0.7  |      | 2.6  |      |         |      |      |
| 1286.5     | [4, 1, 2, 0, 0] | 4.6             |      |      |      |      | 1.5                 |      |      |      |      |         |      |      |
| 1350.5     | [2, 3, 3, 0, 0] |                 |      |      |      |      |                     |      |      | 2.4  |      |         |      |      |
| 1391.3     | [3, 2, 3, 0, 0] |                 |      |      |      |      |                     | 8.7  | 3.8  | 1.7  |      |         |      |      |
| 1407.3     | [3, 3, 2, 0, 0] |                 |      |      |      |      |                     |      |      | 1.7  |      |         |      |      |
| 1448.4     | [4, 2, 2, 0, 0] | 7.0             |      | 8.0  |      |      |                     |      |      |      |      | 7.6     |      |      |
| 1594.4     | [4, 2, 3, 0, 0] | 8.5             |      | 1.2  |      |      |                     |      |      |      |      |         |      |      |
| 1798.0     | [5, 2, 3, 0, 0] | 1.7             |      |      |      |      |                     |      |      |      |      |         |      |      |
| Sialylated |                 |                 |      |      |      |      |                     |      |      |      |      |         |      |      |
| 676.2      | [1, 1, 0, 1, 0] | 3.6             |      |      |      |      |                     |      | 0.7  | 1.0  |      |         |      |      |
| 717.2      | [2, 0, 0, 1, 0] | 1.1             |      | 0.8  |      |      |                     |      | 0.8  | 0.9  |      |         |      |      |
| 879.1      | [2, 1, 0, 1, 0] |                 | 1.9  | 1.1  | 1.2  | 1.7  | 2.0                 |      | 1.8  | 1.4  | 1.4  | 2.2     | 0.9  | 3.5  |
| 967.2      | [1, 1, 0, 2, 0] | 1.5             |      |      |      |      |                     |      |      |      |      |         |      |      |
| 1025.2     | [2, 1, 1, 1, 0] | 1.1             |      |      |      |      |                     |      | 1.1  | 0.9  | 2.0  |         |      |      |
| 1041.5     | [2, 2, 0, 1, 0] | 3.2             | 7.6  | 1.4  | 4.7  |      | 4.9                 | 1.6  | 3.0  | 2.7  | 3.4  | 4.6     |      |      |
| 1082.3     | [3, 1, 0, 1, 0] | 6.7             | 9.4  | 6.8  | 1.9  | 4.0  | 2.9                 | 3.0  | 1.6  | 2.9  | 3.8  |         | 5.4  |      |
| 1187.4     | [2, 2, 1, 1, 0] | 2.4             | 9.6  | 5.3  | 9.9  | 8.7  | 7.3                 | 1.4  | 12.5 | 6.4  | 6.4  | 6.3     | 2.2  | 16.5 |
| 1228.4     | [3, 1, 1, 1, 0] |                 |      |      |      |      | 1.7                 |      | 3.0  |      |      |         |      |      |
| 1244.4     | [3, 2, 0, 1, 0] | 2.7             | 7.4  | 2.2  |      | 4.2  | 10.5                | 8.5  | 0.8  | 3.3  | 2.6  | 13.1    |      |      |
| 1316.4     | [2, 1, 1, 2, 0] |                 |      |      |      |      |                     |      | 1.0  |      |      |         |      |      |
| 1332.3     | [2, 2, 0, 2, 0] | 6.7             |      |      | 4.5  | 8.4  | 2.4                 |      | 4.6  | 4.7  |      |         |      |      |
| 1333.4     | [2, 2, 2, 1, 0] |                 | 3.3  | 1.3  |      | 7.4  |                     |      |      | 3.2  |      |         |      |      |
| 1390.4     | [3, 2, 1, 1, 0] | 7.9             | 25.3 | 12.0 | 6.4  | 11.6 | 12.9                | 13.5 | 17.1 | 15.4 | 10.6 | 19.8    | 12.1 | 18.5 |
| 1478.4     | [2, 2, 1, 2, 0] | 3.7             | 5.8  |      | 12.2 |      | 5.0                 |      | 3.4  | 1.4  | 4.9  | 3.9     |      |      |
| 1535.4     | [3, 2, 0, 2, 0] |                 |      | 2.5  |      |      |                     |      |      | 1.4  | 1.9  | 5.3     |      |      |
| 1536.7     | [3, 2, 2, 1, 0] | 0.6             | 7.2  | 7.3  |      |      | 1.7                 | 4.5  | 3.9  | 3.5  | 3.1  |         | 6.1  |      |
| 1552.3     | [3, 3, 1, 1, 0] |                 |      |      | 4.1  |      | 2.3                 |      |      | 3.7  |      |         |      |      |
| 1593.5     | [4, 2, 1, 1, 0] | 9.8             |      | 2.2  |      |      |                     |      |      |      |      | 10.0    |      |      |
| 1681.3     | [3, 2, 1, 2, 0] |                 | 2.6  | 1.7  |      |      |                     |      | 9.0  |      |      |         |      |      |
| 1698.0     | [3, 3, 2, 1, 0] |                 |      |      |      |      |                     |      |      | 0.4  | 1.8  |         |      |      |
| 1698.8     | [3, 3, 0, 2, 0] |                 |      |      | 1.7  |      |                     |      |      | 1.2  | 0.8  |         |      |      |
| 1739.4     | [4, 2, 2, 1, 0] | 3.3             |      |      |      |      |                     |      |      |      |      |         |      |      |
| 1756.0     | [4, 3, 1, 1, 0] |                 |      |      |      |      |                     |      |      | 0.6  |      |         |      |      |
| 1828.0     | [3, 2, 2, 2, 0] |                 |      |      | 1.7  |      |                     | 2.4  |      |      |      |         |      |      |
| 1844.0     | [3, 3, 1, 2, 0] |                 |      |      | 3.0  |      |                     |      |      |      |      |         |      |      |
| 1901.0     | [4, 3, 0, 2, 0] |                 |      |      |      |      |                     |      |      |      | 1.5  |         |      |      |
| 1902.2     | [4, 3, 2, 1, 0] | 0.9             |      |      |      |      |                     |      |      | 1.7  |      |         |      |      |
| 1990.4     | [3, 3, 2, 2, 0] |                 |      |      |      |      | 2.2                 |      | 1.6  |      |      | 4.1     |      |      |
| 2064.2     | [4, 4, 2, 1, 0] |                 |      |      | 2.1  |      |                     |      |      |      |      |         |      |      |
| 2192.8     | [4, 3, 2, 2, 0] |                 |      |      |      |      |                     |      | 1.4  |      |      |         |      |      |
| 2208.6     | [4, 4, 1, 2, 0] |                 |      |      |      |      |                     |      | 0.5  |      | 0.9  |         |      |      |
| 2209.8     | [4, 4, 3, 1, 0] |                 |      |      |      |      | 2.1                 |      | 1.2  |      |      | 1.5     |      |      |
| 2280.8     | [3, 3, 2, 3, 0] |                 |      |      | 4.2  |      | 1.6                 |      | 2.6  |      | 1.5  |         |      |      |
| 2282.9     | [3, 3, 4, 2, 0] |                 |      |      | 2.5  |      |                     |      |      |      |      |         |      |      |
| 2354.8     | [4, 4, 2, 2, 0] |                 |      |      |      |      |                     |      |      |      |      | 3.0     |      |      |
| 2499.6     | [4, 4, 1, 3, 0] |                 |      |      | 4.1  |      | 2.1                 |      | 1.5  |      |      | 3.8     |      |      |
| 2500.8     | [4, 4, 3, 2, 0] |                 |      |      |      |      |                     |      | 1.8  |      |      |         |      |      |
| 2646.4     | [4, 4, 2, 3, 0] |                 |      |      | 5.9  |      | 4.2                 |      | 3.7  |      |      | 5.3     | 4.3  |      |
| 2791.2     | [4, 4, 1, 4, 0] |                 |      |      | 4.1  |      |                     |      |      |      |      |         |      |      |
| 2792.4     | [4, 4, 3, 3, 0] |                 |      |      |      |      | 2.0                 |      |      |      |      | 2.7     |      |      |
| 2866.6     | [5, 5, 3, 2, 0] |                 |      |      | 3.6  |      |                     |      |      |      |      |         |      |      |
| 2994.6     | [5, 4, 1, 4, 0] |                 |      |      |      |      |                     |      | 1.6  |      |      |         |      |      |
| 3156.4     | [5, 5, 1, 4, 0] |                 |      |      | 3.1  |      |                     |      | 3.5  |      |      |         |      |      |
| 3157.0     | [5, 5, 3, 3, 0] |                 |      |      | 3.7  |      |                     |      |      |      |      | 4.8     |      |      |
| Sulfated   |                 |                 |      |      |      |      |                     |      |      |      |      |         |      |      |
| 959.1      | [2, 1, 0, 1, 1] | 2.1             |      |      |      |      |                     |      | 1.3  |      |      |         |      |      |
| 1105.3     | [2, 1, 1, 1, 1] |                 |      |      |      |      |                     |      | 1.4  |      |      |         |      |      |
| 1121.2     | [2, 2, 0, 1, 1] |                 |      |      |      |      |                     |      | 5.1  | 1.3  |      |         |      |      |
| 1179.2     | [3, 2, 1, 0, 1] |                 |      |      |      |      | 2.2                 |      | 1.3  |      | 1.0  |         | 4.5  |      |
| 1267.1     | [2, 2, 1, 1, 1] | 0.5             |      |      |      |      | 1.9                 |      |      |      | 0.7  |         |      |      |
| 1470.2     | [3, 2, 1, 1, 1] |                 |      |      |      |      | 2.0                 |      |      |      |      |         |      |      |
| 1471.6     | [3, 2, 3, 0, 1] |                 |      | 1.7  |      |      |                     |      |      |      |      |         |      |      |
| 2014.0     | [4, 5, 0, 1, 1] |                 |      |      |      |      |                     |      |      | 1.0  |      |         |      |      |
| 2143.6     | [4, 4, 2, 1, 1] |                 |      |      |      |      | 2.0                 |      |      |      |      |         |      |      |
| 2433.8     | [4, 4, 0, 3, 1] |                 |      |      |      |      |                     |      |      |      |      |         | 5.2  |      |
| 2580.6     | [4, 4, 1, 3, 1] |                 |      |      |      |      | 2.3                 |      | 1.5  |      |      |         |      |      |
| 2799.9     | [5, 5, 2, 2, 1] |                 |      |      |      |      |                     |      |      |      |      |         | 5.4  |      |
| 2945.4     | [5, 5, 1, 3, 1] |                 |      |      | 6.2  |      |                     |      |      |      |      |         |      |      |
| 2946.2     | [5, 5, 3, 2, 1] |                 |      |      |      |      |                     |      |      | 2.0  |      |         |      |      |
| 3311.0     | [6, 6, 3, 2, 1] |                 |      |      |      |      | 2.9                 |      |      |      |      |         |      |      |

M, measured neutral reduced mass; Composition, [N -acetylhexosamine, hexose, fucose, N -acetylneuraminic acid, sulfate]. Assumption: All deoxyhexoses are fucose.

**Table S4. Monosaccharide compositions of O-linked oligosaccharides from gp-340.**

O-linked oligosaccharides were released by reductive  $\beta$ -elimination from gp-340 in submucosal gland secretions. The resulting oligosaccharide alditols were analysed by LC-ESI-MS/MS, and their relative intensities were determined based on single-ion chromatograms. GlycoComp was used to determine the monosaccharide composition of the detected oligosaccharides. Masses corresponding to oligosaccharides, the monosaccharide composition of each oligosaccharide and the normalised percent abundance of each oligosaccharide from each subject are shown. Although neutral oligosaccharides were only detected from subjects with non-CF lung disease, the low abundance of these components means that there are no significant differences in monosaccharide abundance between the subject groups.

| M          | Composition           | CF Lung Disease |      |      |      |      | Non-CF Lung Disease |      |      |      |      | Control |      |      |
|------------|-----------------------|-----------------|------|------|------|------|---------------------|------|------|------|------|---------|------|------|
|            |                       | 1               | 2    | 3    | 4    | 5    | 1                   | 2    | 3    | 4    | 5    | 1       | 2    | 3    |
| Neutral    |                       |                 |      |      |      |      |                     |      |      |      |      |         |      |      |
| 588.1      | [ 2 , 1 , 0 , 0 , 0 ] |                 |      |      |      |      | 1.9                 |      |      |      |      |         |      |      |
| 750.3      | [ 2 , 2 , 0 , 0 , 0 ] |                 |      |      |      |      | 3.7                 |      |      |      |      |         |      |      |
| 896.2      | [ 2 , 2 , 1 , 0 , 0 ] |                 |      |      |      |      | 1.0                 |      |      |      |      |         |      |      |
| 953.3      | [ 3 , 2 , 0 , 0 , 0 ] |                 |      |      |      |      | 6.6                 |      |      |      |      |         |      |      |
| 1042.4     | [ 2 , 2 , 2 , 0 , 0 ] |                 |      |      |      |      |                     |      |      | 3.2  |      |         |      |      |
| 1099.3     | [ 3 , 2 , 1 , 0 , 0 ] |                 |      |      |      |      | 4.9                 |      |      | 8.3  |      |         |      |      |
| 1188.3     | [ 2 , 2 , 3 , 0 , 0 ] |                 |      |      |      |      |                     |      |      |      | 1.0  |         |      |      |
| 1245.4     | [ 3 , 2 , 2 , 0 , 0 ] |                 |      |      |      |      |                     |      |      | 7.7  |      |         |      |      |
| 1391.3     | [ 3 , 2 , 3 , 0 , 0 ] |                 |      |      |      |      |                     |      |      | 2.2  |      |         |      |      |
| 2064.8     | [ 4 , 4 , 4 , 0 , 0 ] |                 |      |      |      |      |                     |      |      |      | 3.6  |         |      |      |
| Sialylated |                       |                 |      |      |      |      |                     |      |      |      |      |         |      |      |
| 676.2      | [ 1 , 1 , 0 , 1 , 0 ] | 16.5            | 6.7  |      |      |      |                     |      |      |      |      |         |      | 3.6  |
| 879.1      | [ 2 , 1 , 0 , 1 , 0 ] |                 |      |      |      |      | 1.9                 |      |      |      |      |         |      |      |
| 967.3      | [ 1 , 1 , 0 , 2 , 0 ] |                 |      |      |      |      |                     |      |      |      |      |         |      | 6.0  |
| 1041.5     | [ 2 , 2 , 0 , 1 , 0 ] |                 |      |      |      |      | 6.3                 |      |      | 5.2  |      |         |      |      |
| 1187.4     | [ 2 , 2 , 1 , 1 , 0 ] |                 |      |      | 14.4 |      | 11.7                |      |      | 5.2  | 1.2  |         |      |      |
| 1244.4     | [ 3 , 2 , 0 , 1 , 0 ] |                 |      |      |      |      | 9.9                 |      |      |      |      |         |      |      |
| 1316.4     | [ 2 , 1 , 1 , 2 , 0 ] | 26.8            | 7.2  | 9.0  | 9.9  |      |                     |      |      |      |      |         |      |      |
| 1332.3     | [ 2 , 2 , 0 , 2 , 0 ] | 27.7            | 50.5 | 48.5 | 48.1 | 62.2 | 7.0                 | 29.2 | 40.2 | 26.2 | 18.9 | 25.3    | 21.6 | 11.4 |
| 1390.4     | [ 3 , 2 , 1 , 1 , 0 ] |                 |      |      |      |      | 22.6                |      |      | 7.1  |      | 3.9     |      |      |
| 1478.4     | [ 2 , 2 , 1 , 2 , 0 ] | 16.7            | 15.0 | 18.5 | 42.3 | 37.8 | 11.9                | 14.8 | 14.7 | 10.5 | 20.0 | 15.1    | 16.8 | 25.1 |
| 1844.0     | [ 3 , 3 , 1 , 2 , 0 ] |                 |      |      |      |      |                     |      |      |      | 1.4  |         |      |      |
| 1990.4     | [ 3 , 3 , 2 , 2 , 0 ] |                 |      |      |      |      |                     |      |      |      | 4.6  | 3.0     |      | 13.2 |
| 2208.8     | [ 4 , 4 , 1 , 2 , 0 ] |                 |      |      |      |      |                     |      |      |      | 1.6  |         |      |      |
| 2353.6     | [ 4 , 4 , 0 , 3 , 0 ] |                 |      |      |      |      |                     | 8.3  | 8.5  | 6.4  |      | 10.1    | 20.0 |      |
| 2280.8     | [ 3 , 3 , 2 , 3 , 0 ] |                 |      |      |      |      |                     |      |      |      | 4.2  |         |      |      |
| 2499.6     | [ 4 , 4 , 1 , 3 , 0 ] |                 |      |      |      |      |                     |      | 17.2 | 19.1 | 9.0  | 14.8    | 30.0 | 8.1  |
| 2500.4     | [ 4 , 4 , 3 , 2 , 0 ] | 12.4            | 20.6 | 7.3  |      |      | 3.5                 | 5.4  |      |      | 12.4 |         |      |      |
| 2646.4     | [ 4 , 4 , 2 , 3 , 0 ] |                 |      |      |      |      |                     | 14.4 | 9.9  | 6.2  | 13.7 | 9.4     | 11.6 | 14.8 |
| 2791.2     | [ 4 , 4 , 1 , 4 , 0 ] |                 |      |      |      |      |                     |      |      | 7.7  |      |         |      |      |
| 2792.4     | [ 4 , 4 , 3 , 3 , 0 ] |                 |      |      |      |      | 6.1                 | 10.8 |      |      | 13.6 | 7.6     |      | 13.9 |
| Sulfated   |                       |                 |      |      |      |      |                     |      |      |      |      |         |      |      |
| 1105.3     | [ 2 , 1 , 1 , 1 , 1 ] |                 |      |      |      |      |                     |      |      |      | 2.9  |         |      |      |
| 2579.8     | [ 4 , 4 , 1 , 3 , 1 ] |                 |      |      |      |      |                     |      |      |      | 3.9  | 5.0     |      |      |

M, measured neutral reduced mass; Composition, [N -acetylhexosamine, hexose, fucose, N -acetylneuraminic acid, sulfate]. Assumption: All deoxyhexoses are fucose.

**Table S5. Structures of *O*-linked oligosaccharides from MUC5B/MUC5AC.** *O*-linked oligosaccharides were released by reductive  $\beta$ -elimination from MUC5B/MUC5AC in submucosal gland secretions. The resulting oligosaccharide alditols were analysed by LC-ESI-MS/MS, and their relative intensities were determined based on single-ion chromatograms. GlycosidIQ was used to assign structures to the detected oligosaccharides, which were also manually validated. Oligosaccharides were found to contain all major *O*-glycan cores, both chain types, and had terminal epitopes dominated by Lewis-type and blood group antigens. Masses corresponding to oligosaccharides, assigned oligosaccharide structures and the normalised percent abundance of each oligosaccharide from each subject are shown. Abbreviations: Fuc, fucose; Gal, galactose; GlcNAc, *N*-acetylglucosamine; GalNAc, *N*-acetylgalactosamine; NeuAc, *N*-acetylneuraminic acid; a –  $\alpha$  linkage; b –  $\beta$  linkage; 1, 2, 3, 4, 6 – linked carbon position.

| M          | Structure                                                                                 | CF Diseased |      |      |     |      | non-CF Diseased |      |      |      |     | Control |      |      |
|------------|-------------------------------------------------------------------------------------------|-------------|------|------|-----|------|-----------------|------|------|------|-----|---------|------|------|
|            |                                                                                           | 1           | 2    | 3    | 4   | 5    | 1               | 2    | 3    | 4    | 5   | 1       | 2    | 3    |
| Neutral    |                                                                                           |             |      |      |     |      |                 |      |      |      |     |         |      |      |
| 531.2      | Fuc(a1-2)Gal(b1-3)GalNAc                                                                  |             |      |      |     | 6.1  |                 |      |      |      |     |         |      |      |
| 588.2      | Gal(b1-3)GlcNAc(b1-3)GalNAc                                                               |             |      |      |     |      |                 |      |      |      |     | 3.9     |      | 6.5  |
| 588.2      | Gal(b1-4)GlcNAc(b1-3)GalNAc                                                               | 1.0         |      | 1.4  |     |      | 1.3             |      | 1.7  |      |     |         |      |      |
| 734.0      | *Gal(b1-3)[GlcNAc(b1-6)]GalNAc                                                            |             |      |      |     |      |                 |      |      |      |     |         |      | 1.3  |
| 734.0      | Fuc(a1-2)Gal(b1-3)[GlcNAc(b1-6)]GalNAc                                                    | 1.1         |      |      |     |      |                 |      |      |      |     |         | 1.5  |      |
| 734.0      | Fuc(a1-2)Gal(b1-3)GalNAc                                                                  | 1.0         |      |      |     |      |                 |      |      |      |     |         |      |      |
| 734.2      | Fuc(a1-3/4)Gal(b1-3/4)GlcNAc(b1-3)GalNAc                                                  | 0.4         |      |      |     |      |                 |      |      | 3.9  |     | 3.9     | 3.1  |      |
| 734.2      | Fuc(a1-2)Gal(b1-3)GlcNAc(b1-3)GalNAc                                                      |             | 2.5  |      |     | 4.8  |                 |      |      |      |     |         |      | 4.8  |
| 734.2      | Fuc(a1-2)Gal(b1-4)GlcNAc(b1-3)GalNAc                                                      |             |      |      |     | 1.7  |                 |      |      |      |     |         |      |      |
| 750.3      | Gal(b1-3)[Gal(b1-4)GlcNAc(b1-6)]GalNAc                                                    |             |      |      | 1.9 |      | 2.9             | 1.0  | 1.5  | 1.2  | 1.7 | 0.8     |      | 2.5  |
| 750.3      | Gal(b1-3)GlcNAc(b1-3)Gal(b1-3)GalNAc                                                      |             |      |      |     |      |                 |      |      |      |     |         |      | 2.2  |
| 791.2      | GlcNAc(b1-3)[Gal(b1-3)GlcNAc(b1-6)]GalNAc                                                 |             |      |      |     |      |                 |      | 2.1  |      |     |         |      |      |
| 791.2      | GlcNAc(b1-3)[Gal(b1-4)GlcNAc(b1-6)]GalNAc                                                 |             |      |      |     |      |                 |      |      | 1.5  | 1.6 |         |      |      |
| 880.3      | Fuc(a1-2)Gal(b1-3/4)GlcNAc(b1-3/4)GlcNAc(b1-3)GalNAc                                      |             |      |      |     |      |                 |      |      |      |     |         |      | 1.6  |
| 896.2      | Fuc(a1-3/4)Gal(b1-3/4)GlcNAc(b1-3)Gal(b1-3)GalNAc                                         |             |      |      |     |      |                 |      |      |      |     |         |      | 3.9  |
| 896.2      | Gal(b1-3)[Fuc(a1-2)Gal(b1-4)GlcNAc(b1-6)]GalNAc                                           |             | 2.5  | 1.3  |     | 2.1  |                 | 1.8  |      | 1.7  | 0.8 |         |      | 2.6  |
| 896.2      | Fuc(a1-2)Gal(b1-3)[Gal(b1-3)GlcNAc(b1-6)]GalNAc                                           |             |      |      |     | 2.8  |                 |      |      | 1.4  |     |         |      |      |
| 896.2      | Fuc(a1-2)Gal(b1-3)[Gal(b1-4)GlcNAc(b1-6)]GalNAc                                           |             |      |      |     |      |                 |      | 1.6  |      | 1.1 |         |      |      |
| 937.3      | Fuc(a1-2)[GalNAc(a1-3)]Gal(b1-3/4)GlcNAc(b1-3)GalNAc                                      |             |      |      |     |      |                 |      |      |      |     |         |      | 4.4  |
| 937.3      | GlcNAc(b1-3)[Fuc(a1-2)Gal(b1-3)GlcNAc(b1-6)]GalNAc                                        | 6.3         |      | 1.4  |     |      |                 |      |      | 3.0  |     |         |      |      |
| 937.3      | GlcNAc(b1-3)[Fuc(a1-2)Gal(b1-3)GlcNAc(b1-6)]GalNAc                                        |             |      | 6.0  |     | 6.2  |                 | 4.1  |      | 2.7  | 1.2 |         |      | 8.3  |
| 953.3      | Gal(b1-3/4)GlcNAc(b1-3)[Gal(b1-3/4)GlcNAc(b1-6)]GalNAc                                    |             |      |      |     |      | 7.3             | 2.4  | 5.6  | 2.7  | 2.2 | 3.1     |      | 8.6  |
| 1042.4     | Fuc(a1-2)Gal(b1-3)[Fuc(a1-2)Gal(b1-4)GlcNAc(b1-6)]GalNAc                                  |             |      | 4.3  |     | 6.9  |                 | 2.3  |      | 3.2  | 1.6 |         |      | 7.4  |
| 1083.0     | Fuc(a1-2)[GalNAc(a1-3)]Gal(b1-3/4)GlcNAc(b1-3)GalNAc                                      | 2.2         |      |      |     |      |                 |      |      |      |     |         |      |      |
| 1083.0     | GlcNAc(b1-3)[Fuc(a1-2)Gal(b1-3/4)GlcNAc(b1-6)]GalNAc                                      |             |      |      |     | 1.6  |                 |      |      |      |     |         |      |      |
| 1099.3     | Gal(b1-3)[Fuc(a1-2)GalNAc(a1-3)]Gal(b1-3/4)GlcNAc(b1-6)]GalNAc                            | 2.1         |      |      |     |      |                 |      |      |      |     |         |      |      |
| 1099.3     | Fuc(a1-3/4)Gal(b1-3/4)GlcNAc(b1-3)[Gal(b1-3/4)GlcNAc(b1-6)]GalNAc                         |             | 2.4  | 3.2  |     | 2.4  | 4.2             |      | 5.2  |      | 1.2 |         |      |      |
| 1099.3     | Fuc(a1-2)Gal(b1-3)GlcNAc(b1-3)[Gal(b1-3/4)GlcNAc(b1-6)]GalNAc                             |             |      |      |     |      |                 | 8.2  |      | 4.2  | 2.9 |         |      | 4.7  |
| 1099.3     | Gal(b1-3/4)GlcNAc(b1-3)[Fuc(a1-2)Gal(b1-4)GlcNAc(b1-6)]GalNAc                             |             | 3.4  | 3.8  |     | 4.2  |                 | 2.3  |      | 3.2  |     |         |      |      |
| 1099.3     | Gal(b1-3/4)GlcNAc(b1-3)[Fuc(a1-3/4)Gal(b1-3/4)GlcNAc(b1-6)]GalNAc                         |             |      |      |     |      |                 |      |      |      |     |         | 1.6  | 7.5  |
| 1140.0     | GlcNAc(b1-3)[Fuc(a1-2)GalNAc(a1-3)]Gal(b1-4)GlcNAc(b1-6)]GalNAc                           | 6.6         |      |      |     |      |                 |      |      |      |     |         |      |      |
| 1188.3     | Fuc(a1-2)Gal(b1-3)[Fuc(a1-2)Gal(b1-3/4)GlcNAc(b1-6)]GalNAc                                |             |      | 1.8  |     |      | 2.3             |      |      |      |     |         |      |      |
| 1245.4     | Fuc(a1-2)Gal(b1-4)GlcNAc(b1-3)GlcNAc(b1-3)Gal(b1-3)GalNAc                                 |             | 8.1  | 16.8 |     | 16.8 |                 | 14.7 |      | 13.1 | 4.5 |         |      | 4.7  |
| 1245.4     | Fuc(a1-2)Gal(b1-4)GlcNAc(b1-3)[Fuc(a1-2)Gal(b1-4)GlcNAc(b1-6)]GalNAc                      |             |      |      |     |      |                 |      |      |      |     |         |      | 13.0 |
| 1245.4     | Fuc(a1-2)Gal(b1-3)[Fuc(a1-2)GalNAc(a1-3)]Gal(b1-3/4)GlcNAc(b1-6)]GalNAc                   |             |      |      |     |      |                 |      |      |      |     |         |      | 4.2  |
| 1261.3     | Fuc(a1-3/4)Gal(b1-3/4)GlcNAc(b1-3)Gal(b1-3)[Gal(b1-3/4)GlcNAc(b1-6)]GalNAc                |             |      |      |     |      |                 |      |      |      | 1.1 |         |      |      |
| 1286.0     | GlcNAc(b1-3)[Fuc(a1-2)GalNAc(a1-3)]Gal(b1-3/4)GlcNAc(b1-6)]GalNAc                         | 4.5         |      |      |     |      |                 |      | 6.9  |      | 3.2 |         |      |      |
| 1391.3     | Fuc(a1-2)Gal(b1-3)GlcNAc(b1-3)[Fuc(a1-2)Gal(b1-3/4)GlcNAc(b1-6)]GalNAc                    |             |      |      |     |      |                 |      |      |      |     |         |      |      |
| 1448.4     | Fuc(a1-3/4)Gal(b1-3/4)GlcNAc(b1-3)[Fuc(a1-2)Gal(b1-4)GlcNAc(b1-6)]GalNAc                  |             |      |      | 5.3 |      |                 |      |      |      |     |         |      |      |
| 1448.4     | Fuc(a1-2)[GalNAc(a1-3)]Gal(b1-3)GlcNAc(b1-3)[Fuc(a1-2)Gal(b1-4)GlcNAc(b1-6)]GalNAc        |             |      |      | 4.0 |      |                 |      |      |      |     |         |      |      |
| 1448.4     | Fuc(a1-2)[GalNAc(a1-3)]Gal(b1-3)GlcNAc(b1-3)[Fuc(a1-2)Gal(b1-3)GlcNAc(b1-6)]GalNAc        |             |      |      |     |      |                 |      |      |      |     |         |      | 3.4  |
| 1448.4     | Fuc(a1-2)Gal(b1-3)GlcNAc(b1-3)[Fuc(a1-2)GalNAc(a1-3)]Gal(b1-4)GlcNAc(b1-6)]GalNAc         |             |      |      |     |      |                 |      |      |      |     |         |      | 4.2  |
| Sialylated |                                                                                           |             |      |      |     |      |                 |      |      |      |     |         |      |      |
| 676.1      | NeuAc(a2-3/6)Gal(b1-3)GalNAc                                                              | 0.9         |      |      |     |      |                 |      |      |      |     |         |      |      |
| 676.1      | Gal(b1-3)[NeuAc(a2-6)]GalNAc                                                              | 2.5         |      |      |     |      |                 |      |      | 0.8  | 1.1 |         |      |      |
| 717.2      | GlcNAc(b1-3)[NeuAc(a2-6)]GalNAc                                                           |             |      |      |     |      |                 |      |      |      |     |         |      |      |
| 879.1      | Gal(b1-3/4)GlcNAc(b1-3)[NeuAc(a2-6)]GalNAc                                                |             |      |      |     |      |                 |      |      |      |     |         | 2.2  | 0.9  |
| 879.1      | NeuAc(a2-3/6)Gal(b1-3/4)GlcNAc(b1-3)GalNAc                                                |             |      |      |     | 1.2  |                 |      |      |      |     |         |      |      |
| 879.1      | NeuAc(a2-3/6)Gal(b1-4)GlcNAc(b1-3)GalNAc                                                  | 1.9         |      |      |     | 1.7  |                 |      |      |      |     |         |      |      |
| 879.1      | NeuAc(a2-3/6)Gal(b1-3)[GlcNAc(b1-6)]GalNAc                                                |             |      |      |     |      |                 |      |      |      |     |         |      | 0.9  |
| 967.0      | NeuAc(a2-3/6)Gal(b1-3)[NeuAc(a2-6)]GalNAc                                                 | 1.5         |      |      |     |      |                 |      |      |      |     |         |      | 1.5  |
| 1025.2     | Fuc(a1-2)Gal(b1-3)GlcNAc(b1-3)[NeuAc(a2-6)]GalNAc                                         |             |      |      |     |      |                 |      |      |      |     |         |      |      |
| 1025.2     | Fuc(a1-3/4)Gal(b1-3/4)GlcNAc(b1-3)[NeuAc(a2-6)]GalNAc                                     |             |      |      |     |      |                 |      |      |      | 1.2 |         |      |      |
| 1041.5     | Gal(b1-3)[NeuAc(a2-3/6)Gal(b1-3/4)GlcNAc(b1-6)]GalNAc                                     | 1.0         | 7.6  | 1.6  |     |      |                 | 1.6  | 3.0  | 2.2  | 4.2 |         |      |      |
| 1041.5     | Gal(b1-3)[NeuAc(a2-3/6)Gal(b1-4)GlcNAc(b1-6)]GalNAc                                       |             |      |      |     |      |                 | 4.1  |      |      |     |         |      | 1.3  |
| 1041.5     | NeuAc(a2-3/6)Gal(b1-3)[Gal(b1-3/4)GlcNAc(b1-6)]GalNAc                                     | 0.8         |      |      | 3.5 |      |                 |      |      |      |     |         |      | 3.3  |
| 1082.3     | GlcNAc(b1-3)[NeuAc(a2-3/6)Gal(b1-3/4)GlcNAc(b1-6)]GalNAc                                  |             |      |      |     |      |                 |      |      |      |     |         |      |      |
| 1082.3     | NeuAc(a2-3/6)Gal(b1-3/4)GlcNAc(b1-3)[GlcNAc(b1-6)]GalNAc                                  |             |      |      |     |      |                 |      |      |      |     |         |      | 5.4  |
| 1187.4     | NeuAc(a2-3)Gal(b1-3/4)GlcNAc(b1-3)Gal(b1-3)GalNAc                                         | 2.2         |      | 7.8  |     | 5.0  |                 |      |      |      |     |         |      |      |
| 1187.4     | NeuAc(a2-3/6)Gal(b1-3)[Fuc(a1-3/4)Gal(b1-3/4)GlcNAc(b1-6)]GalNAc                          |             | 1.5  |      |     | 4.3  |                 |      |      |      |     |         |      | 4.6  |
| 1187.4     | Gal(b1-3)[NeuAc(a2-3)Gal(b1-3/4)GlcNAc(b1-6)]GalNAc                                       |             | 1.0  |      |     | 4.9  |                 | 7.4  | 12.5 |      | 4.2 |         |      | 7.1  |
| 1187.4     | Fuc(a1-2)Gal(b1-3)[NeuAc(a2-3/6)Gal(b1-3/4)GlcNAc(b1-6)]GalNAc                            |             | 7.1  | 3.2  |     | 4.4  |                 | 1.4  |      | 5.1  | 3.9 |         |      | 1.7  |
| 1187.4     | NeuAc(a2-3/6)Gal(b1-3)[Fuc(a1-2)Gal(b1-4)GlcNAc(b1-6)]GalNAc                              |             |      |      |     | 2.9  |                 |      |      | 1.1  |     |         |      | 2.2  |
| 1228.4     | GlcNAc(b1-3)[NeuAc(a2-3)Gal(b1-3/4)GlcNAc(b1-6)]GalNAc                                    |             |      |      |     |      |                 | 1.7  |      |      |     |         |      |      |
| 1228.4     | NeuAc(a2-3)Gal(b1-3/4)GlcNAc(b1-3/6)[GlcNAc(b1-6)]GalNAc                                  |             |      |      |     |      |                 |      |      | 3.0  |     |         |      |      |
| 1244.4     | NeuAc(a2-3/6)Gal(b1-3/4)GlcNAc(b1-3)[Gal(b1-3/4)GlcNAc(b1-6)]GalNAc                       |             |      |      |     |      |                 |      |      |      |     |         |      |      |
| 1244.4     | NeuAc(a2-3/6)Gal(b1-3/4)GlcNAc(b1-3/6)[Gal(b1-3/4)GlcNAc(b1-6)]GalNAc                     |             |      |      |     |      |                 |      |      |      |     |         |      |      |
| 1244.4     | NeuAc(a2-3/6)Gal(b1-3/4)GlcNAc(b1-3)[Gal(b1-3/4)GlcNAc(b1-6)]GalNAc                       | 7.4         |      |      |     | 4.2  |                 | 10.5 |      | 0.8  | 2.7 | 3.3     | 13.1 |      |
| 1332.3     | NeuAc(a2-3/6)Gal(b1-3)GalNAc                                                              | 6.6         |      |      |     | 8.4  |                 |      |      |      | 4.5 |         |      |      |
| 1332.3     | NeuAc(a2-3/6)Gal(b1-3)[NeuAc(a2-3/6)Gal(b1-3/4)GlcNAc(b1-6)]GalNAc                        |             |      |      | 5.9 |      |                 |      |      |      |     |         |      | 4.2  |
| 1333.4     | NeuAc(a2-3/6)Gal(b1-3)[Fuc(a1-2)Gal(b1-3/4)GlcNAc(b1-6)]GalNAc                            |             |      |      |     | 2.2  |                 |      |      |      |     |         |      |      |
| 1333.4     | Fuc(a1-2)Gal(b1-3)[NeuAc(a2-3)Gal(b1-3/4)GlcNAc(b1-6)]GalNAc                              |             | 3.3  |      |     | 5.2  |                 |      |      |      |     |         |      | 3.3  |
| 1390.4     | Fuc(a1-3/4)Gal(b1-3/4)GlcNAc(b1-3)[NeuAc(a2-3/6)Gal(b1-3/4)GlcNAc(b1-6)]GalNAc            | 21.9        | 10.6 |      |     |      |                 |      |      |      |     |         |      | 10.3 |
| 1390.4     | Fuc(a1-3/4)Gal(b1-3/4)GlcNAc(b1-3/6)[NeuAc(a2-3/6)Gal(b1-3/4)GlcNAc(b1-6)]GalNAc          |             |      |      |     |      |                 |      |      |      |     |         |      |      |
| 1390.4     | Gal(b1-3/4)GlcNAc(b1-3)[NeuAc(a2-3)Gal(b1-3/4)GlcNAc(b1-6)]GalNAc                         |             |      |      |     |      |                 |      |      |      |     |         |      |      |
| 1390.4     | NeuAc(a2-3)Gal(b1-3/4)Fuc(a1-3/4)GlcNAc(b1-3)[Gal(b1-3/4)GlcNAc(b1-6)]GalNAc              |             |      |      |     | 11.6 |                 |      |      | 13.8 | 3.1 |         |      | 19.8 |
| 1390.4     | NeuAc(a2-3)Gal(b1-3/4)Fuc(a1-3/4)GlcNAc(b1-3/6)[Gal(b1-3/4)GlcNAc(b1-6)]GalNAc            |             |      |      |     |      |                 |      |      |      |     |         |      |      |
| 1390.4     | Fuc(a1-2)Gal(b1-3)GlcNAc(b1-3)[NeuAc(a2-3/6)Gal(b1-3/4)GlcNAc(b1-6)]GalNAc                |             | 3.4  |      | 6.4 |      |                 |      |      |      |     |         |      | 12.1 |
| 1390.4     | Fuc(a1-2)Gal(b1-4)GlcNAc(b1-3)[NeuAc(a2-3/6)Gal(b1-3/4)GlcNAc(b1-6)]GalNAc                |             |      |      |     |      |                 |      |      | 13.5 | 1.2 |         |      |      |
| 1478.4     | NeuAc(a2-3)Gal(b1-3)[NeuAc(a2-3)Gal(b1-3/4)GlcNAc(b1-6)]GalNAc                            |             | 5.8  | 3.2  |     |      |                 |      |      |      |     |         |      |      |
| 1478.4     | NeuAc(a2-3)Gal(b1-3)[NeuAc(a2-3)Gal(b1-3/4)GlcNAc(b1-6)]GalNAc                            |             |      |      |     |      |                 |      |      | 3.4  |     |         |      |      |
| 1536.7     | Fuc(a1-3/4)Gal(b1-3/4)GlcNAc(b1-3)[NeuAc(a2-3)Gal(b1-3/4)GlcNAc(b1-6)]GalNAc              |             |      |      |     | 12.1 |                 |      |      |      |     |         |      |      |
| 1536.7     | Fuc(a1-2)Gal(b1-3/4)GlcNAc(b1-3)[NeuAc(a2-3)Gal(b1-3/4)GlcNAc(b1-6)]GalNAc                | 5.1         |      |      |     |      |                 |      |      |      |     |         |      |      |
| 1536.7     | Fuc(a1-2)Gal(b1-3/4)GlcNAc(b1-3)[NeuAc(a2-3)Gal(b1-3/4)GlcNAc(b1-6)]GalNAc                |             |      |      |     |      |                 |      |      |      |     |         |      | 2.0  |
| 1536.7     | Fuc(a1-2)Gal(b1-3/4)GlcNAc(b1-3)[NeuAc(a2-3)Gal(b1-3/4)GlcNAc(b1-6)]GalNAc                |             |      |      |     |      |                 |      |      | 4.5  |     | 2.6     |      |      |
| 1536.7     | NeuAc(a2-3)Gal(b1-3/4)Fuc(a1-3/4)GlcNAc(b1-3/6)[Gal(b1-3/4)GlcNAc(b1-6)]GalNAc            |             |      |      |     |      |                 |      |      |      |     |         |      | 3.9  |
| 1536.7     | NeuAc(a2-3)Gal(b1-3/4)Fuc(a1-3/4)GlcNAc(b1-3/6)[Gal(b1-3/4)GlcNAc(b1-6)]GalNAc            |             |      |      |     |      |                 |      |      |      |     |         |      |      |
| 1552.3     | NeuAc(a2-3)Gal(b1-3/4)Fuc(a1-3/4)GlcNAc(b1-3/6)[Gal(b1-3/4)GlcNAc(b1-6)]GalNAc            |             |      |      |     |      |                 |      |      |      |     |         |      |      |
| 1681.3     | NeuAc(a2-3)Gal(b1-3/4)Fuc(a1-3/4)GlcNAc(b1-3/6)[NeuAc(a2-3)Gal(b1-3/4)GlcNAc(b1-6)]GalNAc |             |      |      |     |      |                 |      |      |      |     |         |      | 7.4  |
| 1681.3     | NeuAc(a2-3)Gal(b1-3/4)Fuc(a1-3/4)GlcNAc(b1-3)[NeuAc(a2-3)Gal(b1-3/4)                      |             |      |      |     |      |                 |      |      |      |     |         |      |      |
